# Supplementary material
Source: PubMed Central journal article supplement (PMC5321222)
Supplement: 10.1194_P065250_jlr.P065250-1.pdf [file 10.1194_P065250_jlr.P065250-1.pdf]

**Supplementary Table S1. Plasma lipids and NMR lipoprotein profiles of participants**

| <b>Parameter</b>  | <b>Fasting (1117)</b> | <b>3.5 h (1044)</b>        | <b>6.0 h (1047)</b>         |
|-------------------|-----------------------|----------------------------|-----------------------------|
| Triglycerides     | 143.2 ± 31.9          | 223.3 ± 139.4 <sup>†</sup> | 205.0 ± 156.6 <sup>†*</sup> |
| Total Cholesterol | 183.7 ± 38.6          | 188.5 ± 40.0               | 192.4 ± 41.2 <sup>†*</sup>  |
| Chylomicrons      | 4.8 ± 4.9             | 58.0 ± 50.6 <sup>†</sup>   | 49.8 ± 56.9 <sup>†</sup>    |
| HDL-C             | 45.5 ± 13.5           | 45.6 ± 14.1                | 48.2 ± 14.3 <sup>†*</sup>   |
| LDL-C             | 116.5 ± 31.9          | 118.6 ± 32.7               | 121.4 ± 32.7 <sup>†</sup>   |
| VLDL-TG           | 106.5 ± 105           | 183.7 ± 135                | 164.8 ± 152.3 <sup>†</sup>  |
| VLDL particle     | 74.4 ± 50             | 68.8 ± 42.6                | 63.1 ± 43.1 <sup>†</sup>    |
| Small VLDL        | 33 ± 22               | 19.6 ± 18.1 <sup>†</sup>   | 24 ± 18.4 <sup>†*</sup>     |
| HDL size          | 8.8 ± 0.5             | 8.9 ± 0.5                  | 9.0 ± 0.5                   |
| VLDL size         | 59.7 ± 10.4           | 51.9 ± 8.7 <sup>†</sup>    | 59.3 ± 11.8                 |

Fasting plasma lipid levels (mg/dl), lipoprotein particle (nmol/l) and size (nm), mean ±s.d., were measured in participants (number indicated in parentheses) after an overnight fast and at 3.5h and 6h after ingestion of a high fat (83%) milkshake (700 calories/m<sup>2</sup> body surface area). Abbreviations: High, low and very low density lipoproteins: HDL, LDL and VLDL. †Compared to fasting, p≤ 0.001, \*p<0.001 compared to 3.5 h.

**Supplementary Table S2: *CD36* tag SNPs related to fasting LDL particle number also associate with postprandial levels of LDL particles**

| SNP                 | Effect Allele      | MAF  | $\beta$ (se) | <i>p</i> -value |
|---------------------|--------------------|------|--------------|-----------------|
| <b><u>3.5 h</u></b> |                    |      |              |                 |
| rs6970109           | C/ <b><u>A</u></b> | 0.10 | 0.24 (0.09)  | 0.0059          |
| rs1722507           | A/ <b><u>G</u></b> | 0.39 | 0.18 (0.05)  | 0.0011          |
| rs1761665           | T/ <b><u>C</u></b> | 0.44 | 0.19 (0.05)  | 0.0005          |
| rs3211842           | G/ <b><u>A</u></b> | 0.42 | 0.16 (0.05)  | 0.0031          |
| rs7755              | G/ <b><u>A</u></b> | 0.46 | 0.14 (0.05)  | 0.0084          |
| <b><u>6.0 h</u></b> |                    |      |              |                 |
| rs1722507           | A/ <b><u>G</u></b> | 0.39 | 0.16 (0.05)  | 0.0026          |
| rs1761665           | T/ <b><u>C</u></b> | 0.44 | 0.17 (0.05)  | 0.0012          |
| rs3211842           | G/ <b><u>A</u></b> | 0.42 | 0.15 (0.05)  | 0.0034          |
| rs7755              | G/ <b><u>A</u></b> | 0.46 | 0.14 (0.05)  | 0.0055          |

SNPs are listed based on genomic location. Effect allele is bolded. Shown are beta-estimates ( $\beta$ )  $\pm$  standard errors and raw *p*-values for representative *CD36* tag SNPs. \*Bonferroni corrections threshold, raw *p*-value <0.006.

**Supplementary Table S3. Associations between rs7755, rs1761665 and adipose tissue CD36 mRNA adjusted for DNA methylation**

|           |            | $\beta$ methylation | $\beta$ SNP | <i>p</i> -value        |
|-----------|------------|---------------------|-------------|------------------------|
| rs7755    | cg18508525 | 1.15                | -0.42       | $6.75 \times 10^{-42}$ |
|           | cg25783969 | 1.65                | -0.42       | $9.62 \times 10^{-42}$ |
|           | cg21055948 | 0.97                | -0.42       | $5.84 \times 10^{-41}$ |
|           | cg19096849 | 0.35                | -0.43       | $5.28 \times 10^{-42}$ |
|           | cg26138637 | 1.22                | -0.42       | $1.48 \times 10^{-42}$ |
|           | cg14093018 | 0.82                | -0.43       | $3.47 \times 10^{-43}$ |
|           | cg05917188 | 0.77                | -0.43       | $5.03 \times 10^{-44}$ |
| rs1761665 | cg18508525 | 1.54                | -0.27       | $8.67 \times 10^{-17}$ |
|           | cg25783969 | 2.21                | -0.27       | $6.9 \times 10^{-17}$  |
|           | cg21055948 | 1.37                | -0.26       | $4.32 \times 10^{-16}$ |
|           | cg19096849 | 0.73                | -0.27       | $1.46 \times 10^{-16}$ |
|           | cg26138637 | 1.63                | -0.27       | $1.90 \times 10^{-17}$ |
|           | cg14093018 | 1.10                | -0.28       | $3.24 \times 10^{-18}$ |
|           | cg05917188 | 1.09                | -0.28       | $1.02 \times 10^{-18}$ |

Given the twin structure of the MuTHER cohort, a mixed-linear model was used to examine SNP effects on *CD36* mRNA levels (ILMN\_1784863; NM\_001001548.1) adjusted for methylation at the designated CpG sites, *p*-values represent effect SNP-expression including methylation within the model.
